# Supplementary material for: CoSx/C hierarchical hollow nanocages from a metal–organic framework as a positive electrode with enhancing performance for aqueous supercapacitors
Source: Royal Society of Chemistry journal article supplement (doi:10.1039/c9ra01167f), 2019-01-01
Supplement: c9ra01167f1.pdf [file c9ra01167f1.pdf]

**CoS<sub>x</sub>/C hierarchical hollow nanocages from metal organic  
framework as positive electrode with enhancing  
performance for aqueous supercapacitors**

Weibin Zhou<sup>#,a,b</sup>, Peng Wang<sup>#,a,b</sup>, Chunyang Li<sup>a,c</sup>, Qinghong Huang, Jing Wang,  
Yusong Zhu<sup>\*a,c</sup>, Lijun Fu<sup>\*a,c</sup>, Yuhui Chen<sup>a,c</sup>, Yuping Wu<sup>\*a,c</sup>

<sup>a</sup> State Key Laboratory of Materials-oriented Chemical Engineering & School of  
Energy Science and Engineering, Nanjing Tech University, Nanjing 211816, China

<sup>b</sup> Institute of Advanced Materials (IAM), Nanjing Tech University, Nanjing 210009,  
China

<sup>c</sup> School of Energy Science and Engineering, Nanjing Tech University, Nanjing  
211816, China

---

#: Equal contribution

\* Correspondence authors: Zhu ([zhuys@njtech.edu.cn](mailto:zhuys@njtech.edu.cn)), Fu ([l.fu@njtech.edu.cn](mailto:l.fu@njtech.edu.cn)), Wu ([wuyp@fudan.edu.cn](mailto:wuyp@fudan.edu.cn))

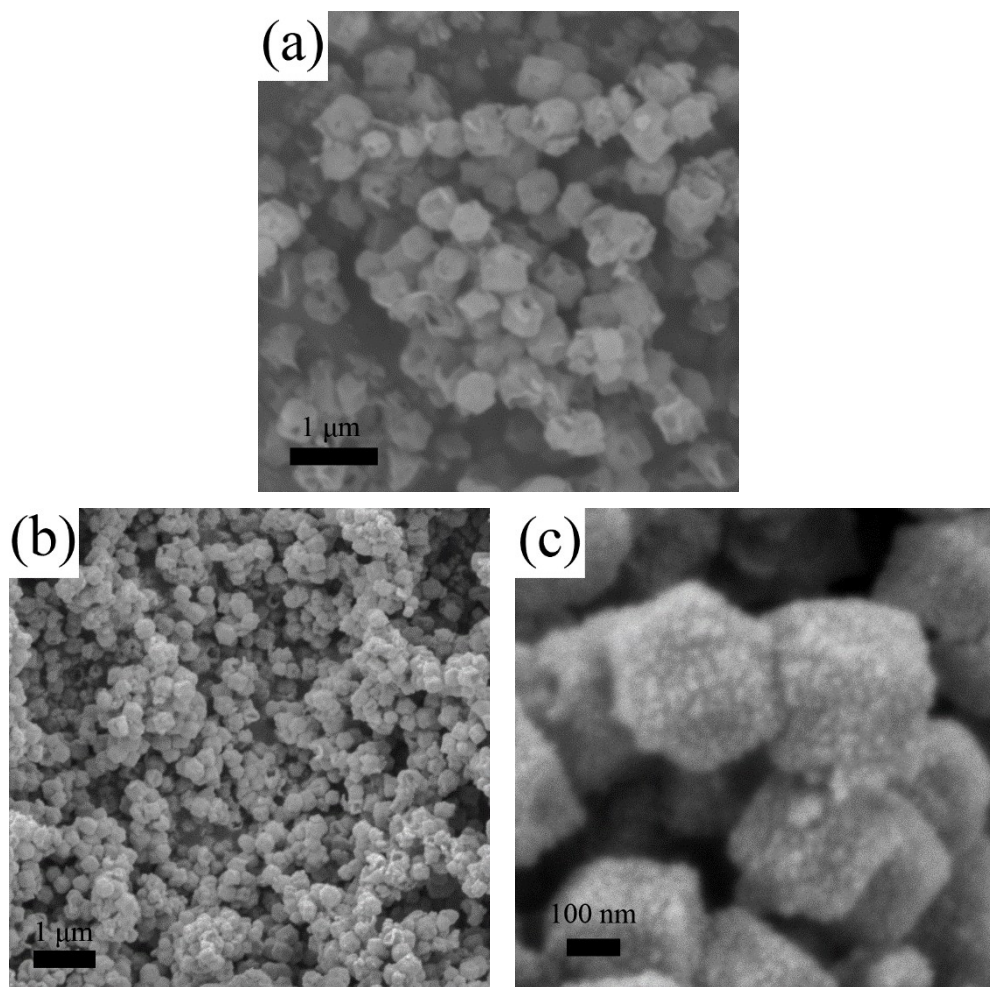

Fig. S1 SEM images of (a) RF hollow shell and (b,c)  $\text{CoS}_x/\text{C-2}$  hollow nanocages with different magnification

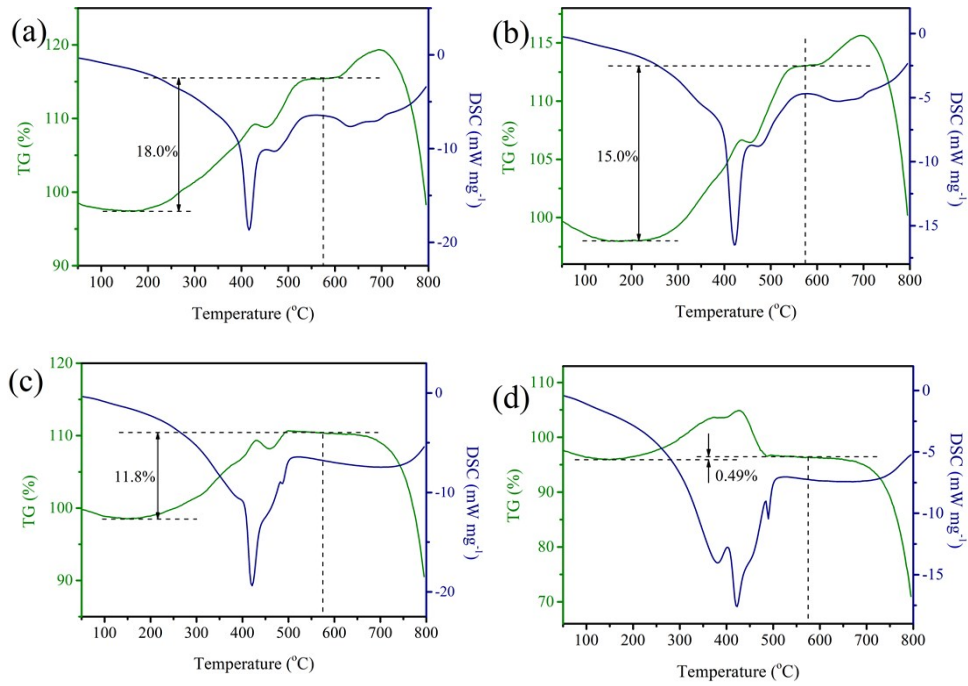

(e)

If temperature raised to 575°C, the content of CoS<sub>x</sub> remained a, the content of carbon decreased to 0, and the content of composition remained b.

$$m_{\text{Total}} = m_{\text{CoS}_x} + m_{\text{Carbon}}$$

At 575°C

$$m_{\text{Total}} = a * m_{\text{CoS}_x} + 0 = b * (m_{\text{CoS}_x} + m_{\text{Carbon}})$$

$$\frac{m_{\text{Carbon}}}{m_{\text{CoS}_x} + m_{\text{Carbon}}} = 1 - \frac{b}{a}$$

Fig. S2 TG-DSC curves of (a) CoS<sub>x</sub>, (b) CoS<sub>x</sub>/C-1, (c) CoS<sub>x</sub>/C-2 and (d) CoS<sub>x</sub>/C-3.

(e) The calculation of Carbon content of composition

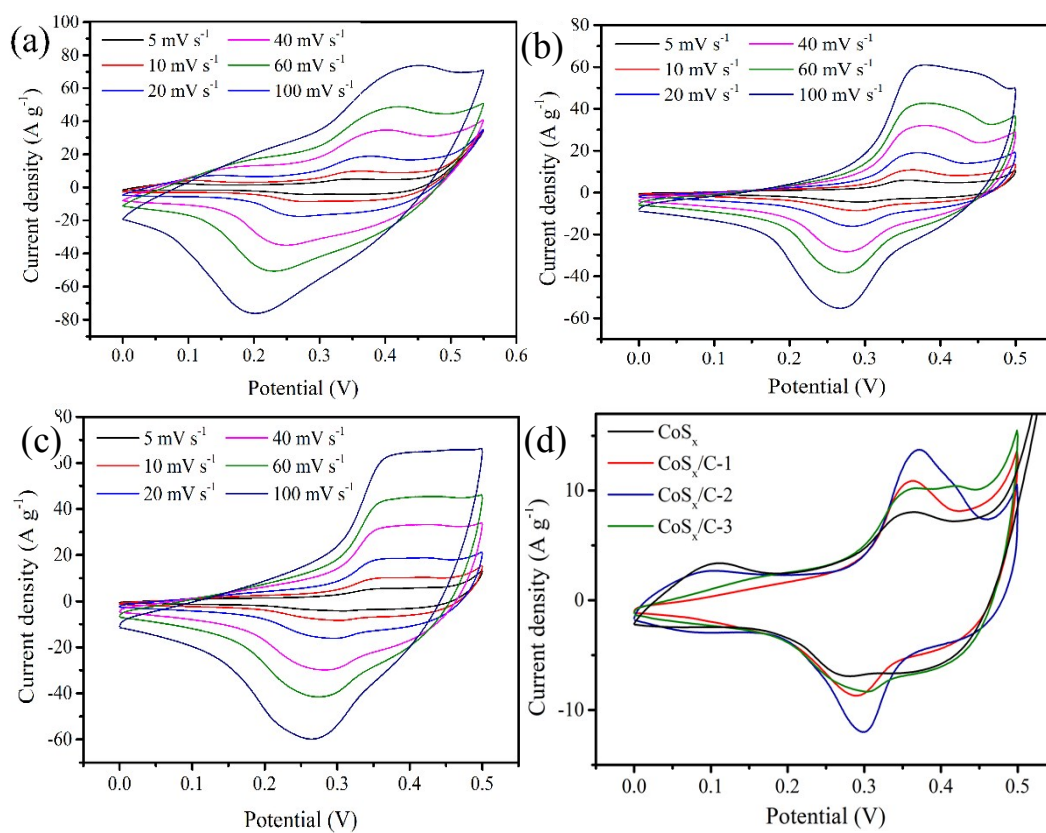

Fig. S3 Comparison of CV curves at different scan rates from 5- 100  $\text{mV s}^{-1}$ : (a) pristine  $\text{CoS}$ . (b) pristine  $\text{CoS}_x/\text{C-1}$ . (c) pristine  $\text{CoS}_x/\text{C-2}$ . (d) Comparison of CV curves at 10  $\text{mV s}^{-1}$  for  $\text{CoS}_x$ ,  $\text{CoS}_x/\text{C-1}$ ,  $\text{CoS}_x/\text{C-2}$  and  $\text{CoS}_x/\text{C-3}$ .

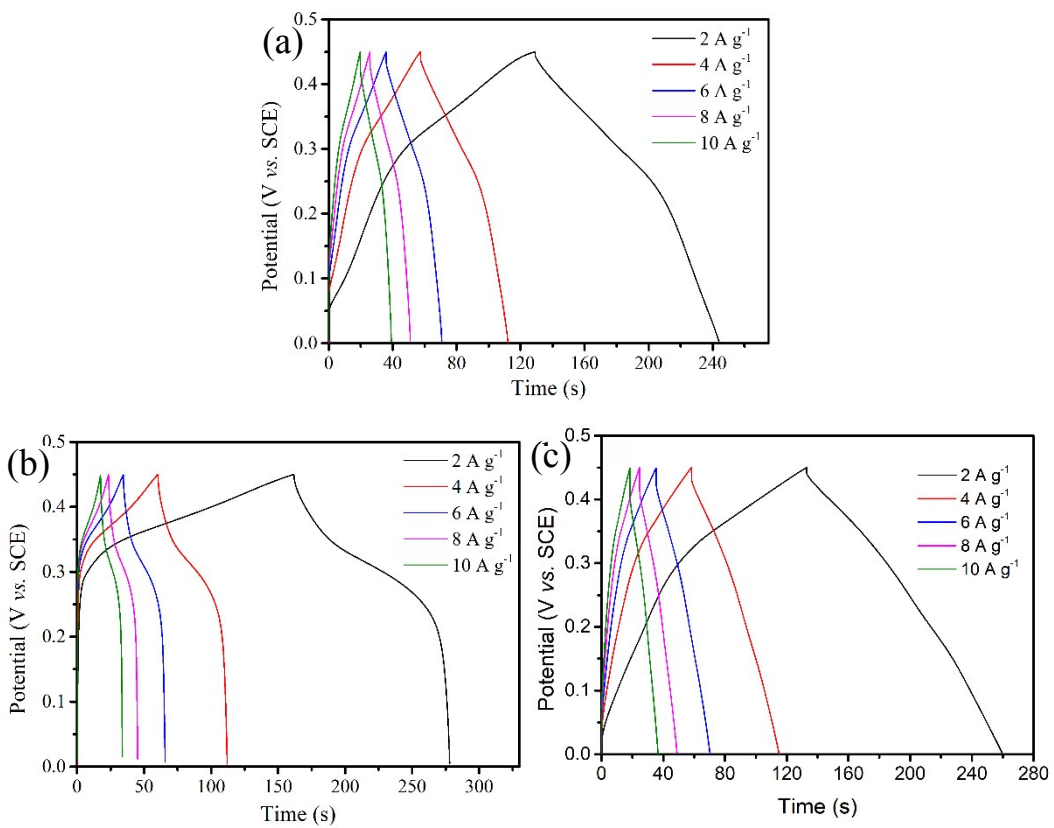

Fig. S4 Galvanostatic charge-discharge curves of (a) pristine CoS, (b) pristine CoS<sub>x</sub>/C-1, and (c) pristine CoS<sub>x</sub>/C-2.
